# Supplementary material for: mRNA-1273 bivalent (original and Omicron) COVID-19 vaccine effectiveness against COVID-19 outcomes in the United States
Source: Springer Nature journal article supplement (doi:10.1038/s41467-023-41537-7), 2023-09-20
Supplement: MOESM1 [file 41467_2023_41537_MOESM1_ESM.pdf]

**mRNA-1273 bivalent (Original and Omicron) COVID-19 vaccine effectiveness against  
COVID-19 outcomes in the United States**

**Authors:** Hung Fu Tseng,<sup>1,2</sup> Bradley K. Ackerson,<sup>1</sup> Lina S. Sy,<sup>1</sup> Julia E. Tubert,<sup>1</sup> Yi Luo,<sup>1</sup> Sijia Qiu,<sup>1</sup> Gina S. Lee,<sup>1</sup> Katia J. Bruxvoort,<sup>1,3</sup> Jennifer H. Ku,<sup>1</sup> Ana Florea,<sup>1</sup> Harpreet S. Takhar,<sup>1</sup> Radha Bathala,<sup>1</sup> Cindy Ke Zhou,<sup>4</sup> Daina B. Esposito,<sup>4</sup> Morgan A. Marks,<sup>4</sup> Evan J. Anderson,<sup>4</sup> Carla A. Talarico,<sup>4,5</sup> Lei Qian<sup>1</sup>

**Affiliations:**

<sup>1</sup>Department of Research and Evaluation, Kaiser Permanente Southern California, Pasadena, CA 91101, USA

<sup>2</sup>Department of Health Systems Science, Kaiser Permanente Bernard J. Tyson School of Medicine, Pasadena, CA 91101, USA

<sup>3</sup>Department of Epidemiology, University of Alabama at Birmingham, Birmingham, AL 35233, USA

<sup>4</sup>Moderna Inc., Cambridge, MA 02139, USA

<sup>5</sup>AstraZeneca, 1 Medimmune Way, Gaithersburg, MD 20878, USA

## Table of Contents

|                                                                                                                                                                                                                                                                                                                   |    |
|-------------------------------------------------------------------------------------------------------------------------------------------------------------------------------------------------------------------------------------------------------------------------------------------------------------------|----|
| <b>Supplementary Table 1.</b> Comparison of baseline characteristics between individuals in the bivalent (original and Omicron BA.4/BA.5) mRNA-1273 COVID-19 vaccine cohort and the COVID-19 unvaccinated cohort.....                                                                                             | 3  |
| <b>Supplementary Table 2.</b> Incidence rate, hazard ratio, and relative effectiveness of the bivalent (original and Omicron BA.4/BA.5) mRNA-1273 COVID-19 vaccine in preventing hospitalization for COVID-19, overall and by subgroups ( $\geq 2$ monovalent mRNA vaccine group as comparator).9                 |    |
| <b>Supplementary Table 3.</b> Incidence rate, hazard ratio, and effectiveness of the bivalent (original and Omicron BA.4/BA.5) mRNA-1273 COVID-19 vaccine in preventing hospitalization for COVID-19, overall and by subgroups (COVID-19 unvaccinated group as comparator). ....                                  | 12 |
| <b>Supplementary Table 4.</b> Incidence rate, hazard ratio, and relative effectiveness of the bivalent (original and Omicron BA.4/BA.5) mRNA-1273 COVID-19 vaccine in preventing medically attended SARS-CoV-2 infection and COVID-19 hospital death ( $\geq 2$ monovalent mRNA vaccine group as comparator)..... | 15 |
| <b>Supplementary Table 5.</b> Incidence rate, hazard ratio, and effectiveness of the bivalent (original and Omicron BA.4/BA.5) mRNA-1273 COVID-19 vaccine in preventing medically attended SARS-CoV-2 infection and COVID-19 hospital death (COVID-19 unvaccinated group as comparator). ....                     | 16 |
| <b>Supplementary Table 6.</b> Strengthening the Reporting of Observational Studies in Epidemiology (STROBE) checklist. ....                                                                                                                                                                                       | 17 |

**Supplementary Table 1.** Comparison of baseline characteristics between individuals in the bivalent (original and Omicron BA.4/BA.5) mRNA-1273 COVID-19 vaccine cohort and the COVID-19 unvaccinated cohort.

|                                 | <b>Bivalent<br/>Vaccine Group</b> | <b>COVID-19<br/>Unvaccinated<br/>Group<sup>a</sup></b> | <b>Total</b>    | <b>p<br/>value</b> | <b>Absolute<br/>Standardized<br/>Difference</b> |
|---------------------------------|-----------------------------------|--------------------------------------------------------|-----------------|--------------------|-------------------------------------------------|
|                                 | <b>N=290292</b>                   | <b>N=204655</b>                                        | <b>N=494947</b> |                    |                                                 |
| Age at index date, years        |                                   |                                                        |                 | <0.01              | 0.34                                            |
| mean (sd)                       | 58.67 (17.53)                     | 52.55 (18.04)                                          | 56.14 (18.00)   |                    |                                                 |
| median                          | 62                                | 53                                                     | 58              |                    |                                                 |
| Q1, Q3                          | 46, 72                            | 40, 66                                                 | 44, 70          |                    |                                                 |
| min, max                        | 6, 10                             | 6, 11                                                  | 6, 11           |                    |                                                 |
| Age at index date, years, n (%) |                                   |                                                        |                 | <0.01              | 0.32                                            |
| 6-17                            | 2715 (0.9%)                       | 2715 (1.3%)                                            | 5430 (1.1%)     |                    |                                                 |
| 18-44                           | 63953 (22.0%)                     | 57434 (28.1%)                                          | 121387 (24.5%)  |                    |                                                 |
| 45-64                           | 96293 (33.2%)                     | 85376 (41.7%)                                          | 181669 (36.7%)  |                    |                                                 |
| 65-74                           | 73258 (25.2%)                     | 37473 (18.3%)                                          | 110731 (22.4%)  |                    |                                                 |
| ≥75                             | 54073 (18.6%)                     | 21657 (10.6%)                                          | 75730 (15.3%)   |                    |                                                 |
| Sex, n (%)                      |                                   |                                                        |                 | <0.01              | 0.02                                            |
| Female                          | 157727 (54.3%)                    | 112732 (55.1%)                                         | 270459 (54.6%)  |                    |                                                 |
| Male                            | 132565 (45.7%)                    | 91923 (44.9%)                                          | 224488 (45.4%)  |                    |                                                 |
| Race/Ethnicity, n (%)           |                                   |                                                        |                 | <0.01              | 0.27                                            |
| Non-Hispanic White              | 114740 (39.5%)                    | 85828 (41.9%)                                          | 200568 (40.5%)  |                    |                                                 |
| Non-Hispanic Black              | 23517 (8.1%)                      | 16662 (8.1%)                                           | 40179 (8.1%)    |                    |                                                 |
| Hispanic                        | 82547 (28.4%)                     | 67279 (32.9%)                                          | 149826 (30.3%)  |                    |                                                 |
| Non-Hispanic Asian              | 50129 (17.3%)                     | 17459 (8.5%)                                           | 67588 (13.7%)   |                    |                                                 |
| Other/Unknown                   | 19359 (6.7%)                      | 17427 (8.5%)                                           | 36786 (7.4%)    |                    |                                                 |

|                                                          | Bivalent<br>Vaccine Group | COVID-19<br>Unvaccinated<br>Group <sup>a</sup> | Total          | p<br>value | Absolute<br>Standardized<br>Difference |
|----------------------------------------------------------|---------------------------|------------------------------------------------|----------------|------------|----------------------------------------|
|                                                          | N=290292                  | N=204655                                       | N=494947       |            |                                        |
| Body mass index <sup>b</sup> , kg/m <sup>2</sup> , n (%) |                           |                                                |                | <0.01      | 0.24                                   |
| <18.5                                                    | 5233 (1.8%)               | 4291 (2.1%)                                    | 9524 (1.9%)    |            |                                        |
| 18.5 - <25                                               | 75876 (26.1%)             | 44238 (21.6%)                                  | 120114 (24.3%) |            |                                        |
| 25 - <30                                                 | 89285 (30.8%)             | 56946 (27.8%)                                  | 146231 (29.5%) |            |                                        |
| 30 - <35                                                 | 53028 (18.3%)             | 37658 (18.4%)                                  | 90686 (18.3%)  |            |                                        |
| 35 - <40                                                 | 24218 (8.3%)              | 17156 (8.4%)                                   | 41374 (8.4%)   |            |                                        |
| 40 - <45                                                 | 10083 (3.5%)              | 6790 (3.3%)                                    | 16873 (3.4%)   |            |                                        |
| ≥45                                                      | 6432 (2.2%)               | 4104 (2.0%)                                    | 10536 (2.1%)   |            |                                        |
| Unknown                                                  | 26137 (9.0%)              | 33472 (16.4%)                                  | 59609 (12.0%)  |            |                                        |
| Smoking <sup>b</sup> , n (%)                             |                           |                                                |                | <0.01      | 0.19                                   |
| No                                                       | 216879 (74.7%)            | 142550 (69.7%)                                 | 359429 (72.6%) |            |                                        |
| Yes                                                      | 55588 (19.1%)             | 38415 (18.8%)                                  | 94003 (19.0%)  |            |                                        |
| Unknown                                                  | 17825 (6.1%)              | 23690 (11.6%)                                  | 41515 (8.4%)   |            |                                        |
| Charlson comorbidity score <sup>c</sup> , n (%)          |                           |                                                |                | <0.01      | 0.33                                   |
| 0                                                        | 162456 (56.0%)            | 145154 (70.9%)                                 | 307610 (62.2%) |            |                                        |
| 1                                                        | 50534 (17.4%)             | 27666 (13.5%)                                  | 78200 (15.8%)  |            |                                        |
| ≥2                                                       | 77302 (26.6%)             | 31835 (15.6%)                                  | 109137 (22.1%) |            |                                        |
| Frailty index <sup>c</sup>                               |                           |                                                |                | <0.01      | 0.16                                   |
| mean (sd)                                                | 0.12 (0.03)               | 0.12 (0.03)                                    | 0.12 (0.03)    |            |                                        |
| median                                                   | 0.11                      | 0.11                                           | 0.11           |            |                                        |
| Q1, Q3                                                   | 0.10, 0.14                | 0.10, 0.13                                     | 0.10, 0.13     |            |                                        |
| min, max                                                 | 0.04, 0.41                | 0.04, 0.41                                     | 0.04, 0.41     |            |                                        |

|                                                                                             | <b>Bivalent<br/>Vaccine Group</b> | <b>COVID-19<br/>Unvaccinated<br/>Group<sup>a</sup></b> | <b>Total</b>    | <b>p<br/>value</b> | <b>Absolute<br/>Standardized<br/>Difference</b> |
|---------------------------------------------------------------------------------------------|-----------------------------------|--------------------------------------------------------|-----------------|--------------------|-------------------------------------------------|
|                                                                                             | <b>N=290292</b>                   | <b>N=204655</b>                                        | <b>N=494947</b> |                    |                                                 |
| Frailty index <sup>c</sup> , n (%)                                                          |                                   |                                                        |                 | <0.01              | 0.35                                            |
| Quartile 1                                                                                  | 77937 (26.8%)                     | 45784 (22.4%)                                          | 123721 (25.0%)  |                    |                                                 |
| Quartile 2                                                                                  | 55217 (19.0%)                     | 68551 (33.5%)                                          | 123768 (25.0%)  |                    |                                                 |
| Quartile 3                                                                                  | 74608 (25.7%)                     | 49109 (24.0%)                                          | 123717 (25.0%)  |                    |                                                 |
| Quartile 4, most frail                                                                      | 82530 (28.4%)                     | 41211 (20.1%)                                          | 123741 (25.0%)  |                    |                                                 |
| Chronic diseases <sup>c</sup> , n (%)                                                       |                                   |                                                        |                 |                    |                                                 |
| Kidney disease                                                                              | 28145 (9.7%)                      | 10538 (5.1%)                                           | 38683 (7.8%)    | <0.01              | 0.17                                            |
| Heart disease                                                                               | 14069 (4.8%)                      | 7477 (3.7%)                                            | 21546 (4.4%)    | <0.01              | 0.06                                            |
| Lung disease                                                                                | 34966 (12.0%)                     | 18063 (8.8%)                                           | 53029 (10.7%)   | <0.01              | 0.11                                            |
| Liver disease                                                                               | 11715 (4.0%)                      | 5996 (2.9%)                                            | 17711 (3.6%)    | <0.01              | 0.06                                            |
| Diabetes                                                                                    | 58781 (20.2%)                     | 24753 (12.1%)                                          | 83534 (16.9%)   | <0.01              | 0.22                                            |
| Immunocompromised status, n (%)                                                             |                                   |                                                        |                 | <0.01              | 0.11                                            |
| Yes                                                                                         | 12338 (4.3%)                      | 4788 (2.3%)                                            | 17126 (3.5%)    |                    |                                                 |
| HIV/AIDS                                                                                    | 1894                              | 295                                                    | 2189            |                    |                                                 |
| Leukemia, lymphoma,<br>congenital and other<br>immunodeficiencies,<br>asplenia/hyposplenism | 5252                              | 2299                                                   | 7551            |                    |                                                 |
| Organ transplant                                                                            | 1205                              | 325                                                    | 1530            |                    |                                                 |
| Immunosuppressant<br>medications                                                            | 6343                              | 2511                                                   | 8854            |                    |                                                 |
| Autoimmune conditions <sup>c</sup> , n (%)                                                  |                                   |                                                        |                 | <0.01              | 0.08                                            |

|                                                                 | <b>Bivalent<br/>Vaccine Group</b> | <b>COVID-19<br/>Unvaccinated<br/>Group<sup>a</sup></b> | <b>Total</b>    | <b>p<br/>value</b> | <b>Absolute<br/>Standardized<br/>Difference</b> |
|-----------------------------------------------------------------|-----------------------------------|--------------------------------------------------------|-----------------|--------------------|-------------------------------------------------|
|                                                                 | <b>N=290292</b>                   | <b>N=204655</b>                                        | <b>N=494947</b> |                    |                                                 |
| Yes                                                             | 12183 (4.2%)                      | 5650 (2.8%)                                            | 17833 (3.6%)    |                    |                                                 |
| Rheumatoid arthritis                                            | 5206                              | 2549                                                   | 7755            |                    |                                                 |
| Inflammatory bowel disease                                      | 2063                              | 971                                                    | 3034            |                    |                                                 |
| Psoriasis and psoriatic arthritis                               | 4641                              | 1930                                                   | 6571            |                    |                                                 |
| Multiple sclerosis                                              | 614                               | 357                                                    | 971             |                    |                                                 |
| Systemic lupus erythematosus                                    | 807                               | 435                                                    | 1242            |                    |                                                 |
| Pregnant at index date, n (%)                                   |                                   |                                                        |                 | <0.01              | 0.06                                            |
| Yes                                                             | 1200 (0.4%)                       | 1759 (0.9%)                                            | 2959 (0.6%)     |                    |                                                 |
| 1st trimester                                                   | 280                               | 503                                                    | 783             |                    |                                                 |
| 2nd trimester                                                   | 462                               | 610                                                    | 1072            |                    |                                                 |
| 3rd trimester                                                   | 458                               | 646                                                    | 1104            |                    |                                                 |
| History of SARS-CoV-2 infection <sup>d</sup> , n (%)            |                                   |                                                        |                 | <0.01              | 0.19                                            |
| Yes                                                             | 69405 (23.9%)                     | 66117 (32.3%)                                          | 135522 (27.4%)  |                    |                                                 |
| ≤180 days                                                       | 31592                             | 13526                                                  | 45118           |                    |                                                 |
| 181-365 days                                                    | 20310                             | 25857                                                  | 46167           |                    |                                                 |
| >365 days                                                       | 17503                             | 26734                                                  | 44237           |                    |                                                 |
| History of SARS-CoV-2 molecular test <sup>d</sup> ,<br>n (%)    | 194122 (66.9%)                    | 118191 (57.8%)                                         | 312313 (63.1%)  | <0.01              | 0.19                                            |
| Number of outpatient and virtual visits <sup>c</sup> , n<br>(%) |                                   |                                                        |                 | <0.01              | 0.56                                            |
| 0                                                               | 12737 (4.4%)                      | 28594 (14.0%)                                          | 41331 (8.4%)    |                    |                                                 |
| 1-4                                                             | 68261 (23.5%)                     | 78391 (38.3%)                                          | 146652 (29.6%)  |                    |                                                 |

|                                                               | <b>Bivalent<br/>Vaccine Group</b> | <b>COVID-19<br/>Unvaccinated<br/>Group<sup>a</sup></b> | <b>Total</b>    | <b>p<br/>value</b> | <b>Absolute<br/>Standardized<br/>Difference</b> |
|---------------------------------------------------------------|-----------------------------------|--------------------------------------------------------|-----------------|--------------------|-------------------------------------------------|
|                                                               | <b>N=290292</b>                   | <b>N=204655</b>                                        | <b>N=494947</b> |                    |                                                 |
| 5-10                                                          | 87609 (30.2%)                     | 50454 (24.7%)                                          | 138063 (27.9%)  |                    |                                                 |
| ≥11                                                           | 121685 (41.9%)                    | 47216 (23.1%)                                          | 168901 (34.1%)  |                    |                                                 |
| Number of Emergency Department<br>visits <sup>c</sup> , n (%) |                                   |                                                        |                 | <0.01              | 0.08                                            |
| 0                                                             | 244234 (84.1%)                    | 166007 (81.1%)                                         | 410241 (82.9%)  |                    |                                                 |
| 1                                                             | 32951 (11.4%)                     | 26830 (13.1%)                                          | 59781 (12.1%)   |                    |                                                 |
| ≥2                                                            | 13107 (4.5%)                      | 11818 (5.8%)                                           | 24925 (5.0%)    |                    |                                                 |
| Number of hospitalizations <sup>c</sup> , n (%)               |                                   |                                                        |                 | <0.01              | 0.05                                            |
| 0                                                             | 276000 (95.1%)                    | 192324 (94.0%)                                         | 468324 (94.6%)  |                    |                                                 |
| 1                                                             | 11132 (3.8%)                      | 9575 (4.7%)                                            | 20707 (4.2%)    |                    |                                                 |
| ≥2                                                            | 3160 (1.1%)                       | 2756 (1.3%)                                            | 5916 (1.2%)     |                    |                                                 |
| Preventive care <sup>c</sup> , n (%)                          | 251979 (86.8%)                    | 111295 (54.4%)                                         | 363274 (73.4%)  | <0.01              | 0.76                                            |
| Medicaid, n (%)                                               | 17571 (6.1%)                      | 23186 (11.3%)                                          | 40757 (8.2%)    | <0.01              | 0.19                                            |
| Neighborhood median household<br>income, n (%)                |                                   |                                                        |                 | <0.01              | 0.17                                            |
| < \$40,000                                                    | 8206 (2.8%)                       | 8353 (4.1%)                                            | 16559 (3.3%)    |                    |                                                 |
| \$40,000-\$59,999                                             | 44119 (15.2%)                     | 36800 (18.0%)                                          | 80919 (16.3%)   |                    |                                                 |
| \$60,000-\$79,999                                             | 62206 (21.4%)                     | 50238 (24.5%)                                          | 112444 (22.7%)  |                    |                                                 |
| ≥\$80,000                                                     | 175589 (60.5%)                    | 108468 (53.0%)                                         | 284057 (57.4%)  |                    |                                                 |
| Unknown                                                       | 172 (0.1%)                        | 796 (0.4%)                                             | 968 (0.2%)      |                    |                                                 |
| Concomitant vaccination <sup>e</sup> , n (%)                  | 50729 (17.5%)                     | N/A                                                    | N/A             | N/A                | N/A                                             |
| Antiviral therapy <sup>f</sup> , n (%)                        |                                   |                                                        |                 | <0.01              | 0.09                                            |

|                                          | <b>Bivalent<br/>Vaccine Group</b> | <b>COVID-19<br/>Unvaccinated<br/>Group<sup>a</sup></b> | <b>Total</b>    | <b>p<br/>value</b> | <b>Absolute<br/>Standardized<br/>Difference</b> |
|------------------------------------------|-----------------------------------|--------------------------------------------------------|-----------------|--------------------|-------------------------------------------------|
|                                          | <b>N=290292</b>                   | <b>N=204655</b>                                        | <b>N=494947</b> |                    |                                                 |
| Yes                                      | 4094 (1.4%)                       | 1126 (0.6%)                                            | 5220 (1.1%)     |                    |                                                 |
| Nirmatrelvir/ritonavir                   | 4058                              | 1113                                                   | 5171            |                    |                                                 |
| Molnupiravir                             | 36                                | 10                                                     | 46              |                    |                                                 |
| Remdesivir                               | 3                                 | 3                                                      | 6               |                    |                                                 |
| Medical center area <sup>g</sup> , n (%) |                                   |                                                        |                 | <0.01              | 0.52                                            |
| Month of index date, n (%)               |                                   |                                                        |                 | <0.01              | 0.03                                            |
| September 2022                           | 45806 (15.8%)                     | 32853 (16.1%)                                          | 78659 (15.9%)   |                    |                                                 |
| October 2022                             | 88322 (30.4%)                     | 59849 (29.2%)                                          | 148171 (29.9%)  |                    |                                                 |
| November 2022                            | 87272 (30.1%)                     | 62030 (30.3%)                                          | 149302 (30.2%)  |                    |                                                 |
| December 2022                            | 68892 (23.7%)                     | 49923 (24.4%)                                          | 118815 (24.0%)  |                    |                                                 |

$\chi^2$  tests were used for categorical variables and two-sided, two-sample t tests were used for continuous variables.

Min, minimum; max, maximum; N/A, not applicable; Q, quartile; sd, standard deviation

<sup>a</sup>Not all bivalent-vaccinated individuals were matched to an COVID-19 unvaccinated comparator. Unmatched bivalent-vaccinated individuals were kept in the analysis.

<sup>b</sup>Defined in the two years prior to index date.

<sup>c</sup>Defined in the one year prior to index date.

<sup>d</sup>Defined based on all available medical records from March 1, 2020 to index date.

<sup>e</sup>Among subjects with concomitant vaccines received with the bivalent mRNA-1273 vaccine: influenza vaccine (89.6%), shingles vaccine (9.1%), pneumococcal vaccine (2.9%), Tdap (2.6%), and other vaccine (1.3%).

<sup>f</sup>Defined during follow-up.

<sup>g</sup>Frequency and percent for the 19 medical center areas not shown.

**Supplementary Table 2.** Incidence rate, hazard ratio, and relative effectiveness of the bivalent (original and Omicron BA.4/BA.5) mRNA-1273 COVID-19 vaccine in preventing hospitalization for COVID-19, overall and by subgroups (≥2 monovalent mRNA vaccine group as comparator).

| Hospitalization for COVID-19          | Bivalent vaccine group |                 |                        |                                          | ≥2 monovalent mRNA vaccine group |                 |                        |                                          | Hazard Ratio (95% CI) |                       | rVE (95% CI)         |                       |
|---------------------------------------|------------------------|-----------------|------------------------|------------------------------------------|----------------------------------|-----------------|------------------------|------------------------------------------|-----------------------|-----------------------|----------------------|-----------------------|
|                                       | N                      | Number of cases | Number of person years | Incidence per 1000 person-years (95% CI) | N                                | Number of cases | Number of person years | Incidence per 1000 person-years (95% CI) | Unadjusted            | Adjusted <sup>a</sup> | Unadjusted           | Adjusted <sup>a</sup> |
| Overall                               | 290292                 | 160             | 59235.05               | 2.70<br>(2.31-3.15)                      | 580584                           | 646             | 76386.05               | 8.46<br>(7.83-9.14)                      | 0.34<br>(0.28-0.40)   | 0.30<br>(0.25-0.36)   | 66.3<br>(59.9-71.7)  | 70.3<br>(64.0-75.4)   |
| Age at index date, years <sup>b</sup> |                        |                 |                        |                                          |                                  |                 |                        |                                          |                       |                       |                      |                       |
| 6-17                                  | 2715                   | 0               | 418                    | N/A                                      | 5430                             | 0               | 698.51                 | N/A                                      | N/A                   | N/A                   | N/A                  | N/A                   |
| 18-44                                 | 63953                  | 2               | 13001.62               | 0.15<br>(0.04-0.62)                      | 127906                           | 10              | 20439.67               | 0.49<br>(0.26-0.91)                      | 0.31<br>(0.07-1.44)   | 0.22<br>(0.04-1.15)   | 68.6<br>(-30.5-93.1) | 78.4<br>(-12.7-95.9)  |
| 45-64                                 | 96293                  | 19              | 19008.44               | 1.00<br>(0.64-1.57)                      | 192586                           | 49              | 26447.6                | 1.85<br>(1.40-2.45)                      | 0.56<br>(0.33-0.95)   | 0.44<br>(0.25-0.77)   | 44.5<br>(5.4-67.4)   | 56.2<br>(22.5-75.2)   |
| 65-74                                 | 73258                  | 41              | 15402.42               | 2.66<br>(1.96-3.62)                      | 146516                           | 148             | 16799.18               | 8.81<br>(7.50-10.35)                     | 0.32<br>(0.23-0.46)   | 0.31<br>(0.21-0.45)   | 67.7<br>(54.1-77.2)  | 69.3<br>(55.2-79.0)   |
| ≥75                                   | 54073                  | 98              | 11404.56               | 8.59<br>(7.05-10.47)                     | 108146                           | 439             | 12001.09               | 36.58<br>(33.31-40.17)                   | 0.24<br>(0.19-0.30)   | 0.29<br>(0.22-0.36)   | 75.7<br>(69.7-80.6)  | 71.4<br>(63.6-77.6)   |
| Sex                                   |                        |                 |                        |                                          |                                  |                 |                        |                                          |                       |                       |                      |                       |
| Female                                | 157727                 | 81              | 32124.22               | 2.52<br>(2.03-3.13)                      | 315454                           | 303             | 41338.32               | 7.33<br>(6.55-8.20)                      | 0.36<br>(0.28-0.46)   | 0.34<br>(0.26-0.44)   | 64.0<br>(53.9-71.9)  | 66.5<br>(56.0-74.5)   |
| Male                                  | 132565                 | 79              | 27110.83               | 2.91<br>(2.34-3.63)                      | 265130                           | 343             | 35047.72               | 9.79<br>(8.80-10.88)                     | 0.32<br>(0.25-0.41)   | 0.27<br>(0.20-0.35)   | 68.3<br>(59.5-75.2)  | 73.4<br>(65.3-79.7)   |
| Race/Ethnicity                        |                        |                 |                        |                                          |                                  |                 |                        |                                          |                       |                       |                      |                       |
| Non-Hispanic White                    | 114740                 | 77              | 24473.05               | 3.15<br>(2.52-3.93)                      | 229480                           | 309             | 29162.19               | 10.60<br>(9.48-11.85)                    | 0.32<br>(0.25-0.41)   | 0.30<br>(0.23-0.40)   | 68.2<br>(59.1-75.3)  | 70.0<br>(60.2-77.4)   |
| Non-Hispanic Black                    | 23517                  | 17              | 4520.19                | 3.76<br>(2.34-6.05)                      | 47034                            | 71              | 5720.44                | 12.41<br>(9.84-15.66)                    | 0.31<br>(0.18-0.53)   | 0.26<br>(0.15-0.47)   | 68.8<br>(46.7-81.7)  | 73.6<br>(53.0-85.1)   |
| Hispanic                              | 82547                  | 44              | 15843.06               | 2.78                                     | 165094                           | 166             | 23173.71               | 7.16                                     | 0.40                  | 0.36                  | 59.8                 | 63.8                  |

| Bivalent vaccine group                                         |        |                 |                        | ≥2 monovalent mRNA vaccine group         |        |                 |                        | Hazard Ratio (95% CI)                    |                     | rVE (95% CI)          |                      |                       |
|----------------------------------------------------------------|--------|-----------------|------------------------|------------------------------------------|--------|-----------------|------------------------|------------------------------------------|---------------------|-----------------------|----------------------|-----------------------|
| Hospitalization for COVID-19                                   | N      | Number of cases | Number of person years | Incidence per 1000 person-years (95% CI) | N      | Number of cases | Number of person years | Incidence per 1000 person-years (95% CI) | Unadjusted          | Adjusted <sup>a</sup> | Unadjusted           | Adjusted <sup>a</sup> |
|                                                                |        |                 |                        | (2.07-3.73)                              |        |                 |                        | (6.15-8.34)                              | (0.29-0.56)         | (0.25-0.52)           | (43.9-71.2)          | (48.4-74.6)           |
| Non-Hispanic Asian                                             | 50129  | 21              | 10450.58               | 2.01<br>(1.31-3.08)                      | 100258 | 84              | 12661.84               | 6.63<br>(5.36-8.22)                      | 0.31<br>(0.19-0.51) | 0.24<br>(0.14-0.40)   | 68.6<br>(49.0-80.6)  | 76.3<br>(59.9-86.0)   |
| Immunocompromised status                                       |        |                 |                        |                                          |        |                 |                        |                                          |                     |                       |                      |                       |
| Yes <sup>c</sup>                                               | 12338  | 30              | 2553.68                | 11.75<br>(8.21-16.80)                    | 19991  | 83              | 2289.59                | 36.25<br>(29.23-44.95)                   | 0.33<br>(0.22-0.51) | 0.35<br>(0.22-0.56)   | 66.7<br>(49.3-78.2)  | 64.7<br>(44.0-77.7)   |
| No                                                             | 277954 | 130             | 56681.38               | 2.29<br>(1.93-2.72)                      | 560593 | 563             | 74096.45               | 7.60<br>(7.00-8.25)                      | 0.32<br>(0.26-0.39) | 0.29<br>(0.23-0.35)   | 68.1<br>(61.3-73.6)  | 71.3<br>(64.5-76.7)   |
| History of SARS-CoV-2 infection                                |        |                 |                        |                                          |        |                 |                        |                                          |                     |                       |                      |                       |
| Yes <sup>d</sup>                                               | 69405  | 21              | 13177.97               | 1.59<br>(1.04-2.44)                      | 155360 | 82              | 21153.77               | 3.88<br>(3.12-4.81)                      | 0.42<br>(0.26-0.68) | 0.39<br>(0.23-0.66)   | 58.1<br>(32.1-74.1)  | 60.7<br>(33.8-76.7)   |
| No                                                             | 220887 | 139             | 46057.08               | 3.02<br>(2.56-3.56)                      | 425224 | 564             | 55232.27               | 10.21<br>(9.40-11.09)                    | 0.31<br>(0.26-0.38) | 0.29<br>(0.24-0.35)   | 68.5<br>(62.1-73.9)  | 71.1<br>(64.6-76.5)   |
| Months of follow-up                                            |        |                 |                        |                                          |        |                 |                        |                                          |                     |                       |                      |                       |
| 0-<1 month                                                     | 290292 | 56              | 23761.66               | 2.36<br>(1.81-3.06)                      | 580584 | 388             | 39288.55               | 9.88<br>(8.94-10.91)                     | 0.24<br>(0.18-0.31) | 0.25<br>(0.19-0.34)   | 76.2<br>(68.5-82.0)  | 74.9<br>(66.4-81.3)   |
| 1-<2 months                                                    | 265962 | 45              | 18967.95               | 2.37<br>(1.77-3.18)                      | 378308 | 197             | 24055.89               | 8.19<br>(7.12-9.42)                      | 0.29<br>(0.21-0.40) | 0.24<br>(0.17-0.35)   | 70.9<br>(59.7-78.9)  | 75.8<br>(65.3-83.2)   |
| 2-<3 months                                                    | 190879 | 46              | 11685.44               | 3.94<br>(2.95-5.26)                      | 211800 | 52              | 10801.58               | 4.81<br>(3.67-6.32)                      | 0.84<br>(0.56-1.24) | 0.41<br>(0.25-0.67)   | 16.5<br>(-19.6-43.9) | 58.9<br>(33.5-74.6)   |
| ≥3 months <sup>e</sup>                                         | 92435  | 13              | 4413.99                | 2.95<br>(1.71-5.07)                      | 62428  | 9               | 2138.48                | 4.21<br>(2.19-8.09)                      | 0.82<br>(0.35-1.92) | 0.20<br>(0.07-0.57)   | 18.2<br>(-48.0-65.2) | 79.6<br>(43.2-92.7)   |
| Number of monovalent vaccines prior to index date <sup>f</sup> |        |                 |                        |                                          |        |                 |                        |                                          |                     |                       |                      |                       |
| 2 doses                                                        | 11493  | 3               | 2203.2                 | 1.36                                     | 135437 | 149             | 22354.78               | 6.67                                     | 0.22                | 0.23                  | 78.0                 | 77.3                  |

| Hospitalization for COVID-19                                       | Bivalent vaccine group |                 |                        |                                          | ≥2 monovalent mRNA vaccine group |                 |                        |                                          | Hazard Ratio (95% CI) |                       | rVE (95% CI)        |                       |
|--------------------------------------------------------------------|------------------------|-----------------|------------------------|------------------------------------------|----------------------------------|-----------------|------------------------|------------------------------------------|-----------------------|-----------------------|---------------------|-----------------------|
|                                                                    | N                      | Number of cases | Number of person years | Incidence per 1000 person-years (95% CI) | N                                | Number of cases | Number of person years | Incidence per 1000 person-years (95% CI) | Unadjusted            | Adjusted <sup>a</sup> | Unadjusted          | Adjusted <sup>a</sup> |
|                                                                    |                        |                 |                        | (0.44-4.22)                              |                                  |                 |                        | (5.68-7.83)                              | (0.07-0.69)           | (0.07-0.72)           | (31.0-93.0)         | (27.6-92.9)           |
| 3 doses                                                            | 144052                 | 48              | 28340.77               | 1.69<br>(1.28-2.25)                      | 287077                           | 311             | 39692.37               | 7.84<br>(7.01-8.76)                      | 0.23<br>(0.17-0.31)   | 0.30<br>(0.22-0.40)   | 77.2<br>(69.0-83.2) | 70.4<br>(59.6-78.3)   |
| ≥4 doses                                                           | 134747                 | 109             | 28691.09               | 3.80<br>(3.15-4.58)                      | 158070                           | 186             | 14338.9                | 12.97<br>(11.24-14.98)                   | 0.29<br>(0.22-0.37)   | 0.28<br>(0.22-0.36)   | 71.3<br>(63.3-77.5) | 71.7<br>(63.7-78.0)   |
| Time between latest monovalent vaccine and index date <sup>g</sup> |                        |                 |                        |                                          |                                  |                 |                        |                                          |                       |                       |                     |                       |
| ≤180 days                                                          | 83060                  | 83              | 19923.17               | 4.17<br>(3.36-5.17)                      | 134392                           | 142             | 13192.87               | 10.76<br>(9.13-12.69)                    | 0.40<br>(0.30-0.52)   | 0.36<br>(0.27-0.48)   | 60.3<br>(47.6-70.0) | 64.0<br>(51.7-73.2)   |
| 181-365 days                                                       | 165276                 | 64              | 33439.32               | 1.91<br>(1.50-2.45)                      | 274298                           | 281             | 37735.09               | 7.45<br>(6.62-8.37)                      | 0.27<br>(0.20-0.35)   | 0.22<br>(0.17-0.29)   | 73.3<br>(65.0-79.7) | 78.0<br>(71.1-83.3)   |
| >365 days                                                          | 41956                  | 13              | 5872.56                | 2.21<br>(1.29-3.81)                      | 171894                           | 223             | 25458.09               | 8.76<br>(7.68-9.99)                      | 0.25<br>(0.14-0.43)   | 0.26<br>(0.15-0.46)   | 75.5<br>(57.1-86.0) | 73.6<br>(53.7-85.0)   |

CI, confidence interval; rVE, relative vaccine effectiveness

<sup>a</sup>Adjusted for covariates age group, sex, race/ethnicity, index date (in months), history of SARS-CoV-2 infection, number of outpatient and virtual visits, preventive care, number of monovalent vaccines prior to index date, time between latest monovalent vaccine and index date, and antiviral therapy. Medical center area removed from adjustment set due to lack of model convergence.

<sup>b</sup>Adjusted for continuous age (in years) in addition to covariates above.

<sup>c</sup>Adjusted for immunocompromising sub-conditions in addition to covariates above.

<sup>d</sup>Adjusted for time since prior SARS-CoV-2 infection in addition to covariates above.

<sup>e</sup>Maximum follow-up time was 4.57 months.

<sup>f</sup>Time between latest monovalent vaccine and index date removed from adjustment set due to lack of model convergence.

<sup>g</sup>Number of monovalent vaccines prior to index date removed from adjustment set due to lack of model convergence.

When the hazard ratio or its 95% CI was >1, the rVE or its 95% CI was transformed as  $([1/\text{hazard ratio}] - 1) \times 100$

**Supplementary Table 3.** Incidence rate, hazard ratio, and effectiveness of the bivalent (original and Omicron BA.4/BA.5) mRNA-1273 COVID-19 vaccine in preventing hospitalization for COVID-19, overall and by subgroups (COVID-19 unvaccinated group as comparator).

| Hospitalization for COVID-19          | Bivalent vaccine group |                 |                        |                                          | COVID-19 unvaccinated group |                 |                        |                                          | Hazard Ratio (95% CI) |                       | VE (95% CI)          |                       |
|---------------------------------------|------------------------|-----------------|------------------------|------------------------------------------|-----------------------------|-----------------|------------------------|------------------------------------------|-----------------------|-----------------------|----------------------|-----------------------|
|                                       | N                      | Number of cases | Number of person years | Incidence per 1000 person-years (95% CI) | N                           | Number of cases | Number of person years | Incidence per 1000 person-years (95% CI) | Unadjusted            | Adjusted <sup>a</sup> | Unadjusted           | Adjusted <sup>a</sup> |
| Overall                               | 290292                 | 160             | 59235.05               | 2.70<br>(2.31-3.15)                      | 204655                      | 341             | 39937.04               | 8.54<br>(7.68-9.49)                      | 0.32<br>(0.26-0.38)   | 0.17<br>(0.14-0.21)   | 68.4<br>(61.9-73.8)  | 82.8<br>(78.8-86.0)   |
| Age at index date, years <sup>b</sup> |                        |                 |                        |                                          |                             |                 |                        |                                          |                       |                       |                      |                       |
| 6-17                                  | 2715                   | 0               | 418                    | N/A                                      | 2715                        | 0               | 411.76                 | N/A                                      | N/A                   | N/A                   | N/A                  | N/A                   |
| 18-44 <sup>c,d</sup>                  | 63953                  | 2               | 13001.62               | 0.15<br>(0.04-0.62)                      | 57434                       | 5               | 11004.34               | 0.45<br>(0.19-1.09)                      | 0.34<br>(0.07-1.74)   | 0.13<br>(0.02-0.89)   | 66.2<br>(-42.7-93.4) | 87.5<br>(10.5-98.2)   |
| 45-64                                 | 96293                  | 19              | 19008.44               | 1.00<br>(0.64-1.57)                      | 85376                       | 43              | 16201.03               | 2.65<br>(1.97-3.58)                      | 0.38<br>(0.22-0.65)   | 0.22<br>(0.12-0.39)   | 62.2<br>(35.1-77.9)  | 78.4<br>(61.2-87.9)   |
| 65-74                                 | 73258                  | 41              | 15402.42               | 2.66<br>(1.96-3.62)                      | 37473                       | 91              | 7774.11                | 11.71<br>(9.53-14.38)                    | 0.23<br>(0.16-0.33)   | 0.18<br>(0.12-0.27)   | 77.3<br>(67.2-84.3)  | 82.1<br>(73.2-88.0)   |
| ≥75                                   | 54073                  | 98              | 11404.56               | 8.59<br>(7.05-10.47)                     | 21657                       | 202             | 4545.79                | 44.44<br>(38.71-51.01)                   | 0.19<br>(0.15-0.25)   | 0.16<br>(0.12-0.21)   | 80.7<br>(75.4-84.8)  | 84.3<br>(79.4-88.1)   |
| Sex                                   |                        |                 |                        |                                          |                             |                 |                        |                                          |                       |                       |                      |                       |
| Female                                | 157727                 | 81              | 32124.22               | 2.52<br>(2.03-3.13)                      | 112732                      | 192             | 22033.95               | 8.71<br>(7.56-10.04)                     | 0.29<br>(0.22-0.37)   | 0.18<br>(0.14-0.24)   | 71. (62.6-77.7)      | 81.8<br>(75.8-86.3)   |
| Male                                  | 132565                 | 79              | 27110.83               | 2.91<br>(2.34-3.63)                      | 91923                       | 149             | 17903.09               | 8.32<br>(7.09-9.77)                      | 0.35<br>(0.27-0.46)   | 0.16<br>(0.12-0.22)   | 65.0<br>(54.1-73.4)  | 83.7<br>(77.7-88.0)   |
| Race/Ethnicity                        |                        |                 |                        |                                          |                             |                 |                        |                                          |                       |                       |                      |                       |
| Non-Hispanic White                    | 114740                 | 77              | 24473.05               | 3.15<br>(2.52-3.93)                      | 85828                       | 183             | 17737.23               | 10.32<br>(8.93-11.93)                    | 0.30<br>(0.23-0.40)   | 0.16<br>(0.12-0.21)   | 69.5<br>(60.3-76.7)  | 84.0<br>(78.5-88.1)   |
| Non-Hispanic Black                    | 23517                  | 17              | 4520.19                | 3.76<br>(2.34-6.05)                      | 16662                       | 44              | 3043.7                 | 14.46<br>(10.76-19.43)                   | 0.26<br>(0.15-0.45)   | 0.14<br>(0.08-0.26)   | 74.0<br>(54.5-85.2)  | 86.1<br>(74.4-92.5)   |
| Hispanic                              | 82547                  | 44              | 15843.06               | 2.78                                     | 67279                       | 82              | 12510.61               | 6.55                                     | 0.42                  | 0.23                  | 57.6                 | 77.0                  |

| Hospitalization for COVID-19    | Bivalent vaccine group |                 |                        |                                          | COVID-19 unvaccinated group |                 |                        |                                          | Hazard Ratio (95% CI) |                       | VE (95% CI)         |                       |
|---------------------------------|------------------------|-----------------|------------------------|------------------------------------------|-----------------------------|-----------------|------------------------|------------------------------------------|-----------------------|-----------------------|---------------------|-----------------------|
|                                 | N                      | Number of cases | Number of person-years | Incidence per 1000 person-years (95% CI) | N                           | Number of cases | Number of person-years | Incidence per 1000 person-years (95% CI) | Unadjusted            | Adjusted <sup>a</sup> | Unadjusted          | Adjusted <sup>a</sup> |
|                                 |                        |                 |                        | (2.07-3.73)                              |                             |                 |                        | (5.28-8.14)                              | (0.29-0.61)           | (0.15-0.34)           | (38.9-70.6)         | (65.5-84.6)           |
| Non-Hispanic Asian              | 50129                  | 21              | 10450.58               | 2.01<br>(1.31-3.08)                      | 17459                       | 27              | 3260                   | 8.28<br>(5.68-12.08)                     | 0.24<br>(0.14-0.42)   | 0.11<br>(0.06-0.21)   | 76.1<br>(57.7-86.5) | 89.2<br>(78.9-94.5)   |
| Immunocompromised status        |                        |                 |                        |                                          |                             |                 |                        |                                          |                       |                       |                     |                       |
| Yes <sup>c,e</sup>              | 12338                  | 30              | 2553.68                | 11.75<br>(8.21-16.80)                    | 4788                        | 25              | 952.23                 | 26.25<br>(17.74-38.85)                   | 0.45<br>(0.26-0.76)   | 0.28<br>(0.16-0.51)   | 55.3<br>(24.0-73.7) | 71.8<br>(48.8-84.5)   |
| No                              | 277954                 | 130             | 56681.38               | 2.29<br>(1.93-2.72)                      | 199867                      | 316             | 38984.81               | 8.11<br>(7.26-9.05)                      | 0.28<br>(0.23-0.35)   | 0.16<br>(0.13-0.20)   | 71.<br>(65.4-77.0)  | 84.1<br>(80.1-87.4)   |
| History of SARS-CoV-2 infection |                        |                 |                        |                                          |                             |                 |                        |                                          |                       |                       |                     |                       |
| Yes <sup>f</sup>                | 69405                  | 21              | 13177.97               | 1.59<br>(1.04-2.44)                      | 66117                       | 58              | 12742.28               | 4.55<br>(3.52-5.89)                      | 0.35<br>(0.21-0.58)   | 0.32<br>(0.18-0.55)   | 64.<br>(42.1-78.7)  | 68.3<br>(45.4-81.6)   |
| No                              | 220887                 | 139             | 46057.08               | 3.02<br>(2.56-3.56)                      | 138538                      | 283             | 27194.75               | 10.41<br>(9.26-11.69)                    | 0.29<br>(0.24-0.35)   | 0.16<br>(0.13-0.20)   | 71.0<br>(64.5-76.4) | 84.3<br>(80.3-87.5)   |
| Months of follow-up             |                        |                 |                        |                                          |                             |                 |                        |                                          |                       |                       |                     |                       |
| 0-<1 month                      | 290292                 | 56              | 23761.66               | 2.36<br>(1.81-3.06)                      | 204655                      | 124             | 16474.69               | 7.53<br>(6.31-8.98)                      | 0.31<br>(0.23-0.43)   | 0.15<br>(0.11-0.22)   | 68.7<br>(57.1-77.2) | 84.8<br>(78.5-89.3)   |
| 1-<2 months                     | 265962                 | 45              | 18967.95               | 2.37<br>(1.77-3.18)                      | 181530                      | 115             | 12788.96               | 8.99<br>(7.49-10.80)                     | 0.26<br>(0.19-0.37)   | 0.14<br>(0.10-0.21)   | 73.6<br>(62.7-81.3) | 85.6<br>(79.0-90.2%)  |
| 2-<3 months                     | 190879                 | 46              | 11685.44               | 3.94<br>(2.95-5.26)                      | 126732                      | 84              | 7627.96                | 11.01<br>(8.89-13.64)                    | 0.36<br>(0.25-0.51)   | 0.23<br>(0.15-0.35)   | 64.2<br>(48.7-75.0) | 76.8<br>(65.0-84.6)   |
| ≥3 months <sup>g</sup>          | 92435                  | 13              | 4413.99                | 2.95<br>(1.71-5.07)                      | 58823                       | 18              | 2797.68                | 6.43<br>(4.05-10.21)                     | 0.46<br>(0.23-0.94)   | 0.25<br>(0.11-0.56)   | 54.1<br>(6.2-77.5)  | 75.5<br>(43.8-89.3)   |

CI, confidence interval; VE, vaccine effectiveness

<sup>a</sup>Adjusted for covariates age group, sex, race/ethnicity, index date (in months), body mass index, smoking, Charlson comorbidity score, frailty index, kidney disease, lung disease, diabetes, immunocompromised status, history of SARS-CoV-2 infection, history of SARS-CoV-2 molecular

test, number of outpatient and virtual visits, preventive care, Medicaid, and antiviral therapy. Neighborhood median household income and medical center area removed from adjustment set due to lack of model convergence.

<sup>b</sup>Adjusted for continuous age (in years) in addition to covariates above.

<sup>c</sup>Smoking removed from adjustment set due to lack of model convergence.

<sup>d</sup>Kidney disease, lung disease, and immunocompromised status removed from adjustment set due to lack of model convergence.

<sup>e</sup>Adjusted for immunocompromising sub-conditions in addition to covariates above.

<sup>f</sup>Adjusted for time since prior SARS-CoV-2 infection in addition to covariates above.

<sup>g</sup>Maximum follow-up time was 4.57 months.

When the hazard ratio or its 95% CI was >1, the VE or its 95% CI was transformed as  $([1/\text{hazard ratio}] - 1) \times 100$ .

**Supplementary Table 4.** Incidence rate, hazard ratio, and relative effectiveness of the bivalent (original and Omicron BA.4/BA.5) mRNA-1273 COVID-19 vaccine in preventing medically attended SARS-CoV-2 infection and COVID-19 hospital death (≥2 monovalent mRNA vaccine group as comparator).

| Outcomes                                | Bivalent vaccine group |                 |                        |                                          | ≥2 monovalent mRNA vaccine group |                 |                        |                                          | Hazard Ratio (95% CI) |                       | rVE (95% CI)        |                       |
|-----------------------------------------|------------------------|-----------------|------------------------|------------------------------------------|----------------------------------|-----------------|------------------------|------------------------------------------|-----------------------|-----------------------|---------------------|-----------------------|
|                                         | N                      | Number of cases | Number of person years | Incidence per 1000 person-years (95% CI) | N                                | Number of cases | Number of person years | Incidence per 1000 person-years (95% CI) | Unadjusted            | Adjusted <sup>a</sup> | Unadjusted          | Adjusted <sup>a</sup> |
| Medically attended SARS-CoV-2 infection |                        |                 |                        |                                          |                                  |                 |                        |                                          |                       |                       |                     |                       |
| All care settings                       | 290292                 | 3221            | 58867.97               | 54.72<br>(52.86-56.64)                   | 580584                           | 4964            | 75886.22               | 65.41<br>(63.62-67.26)                   | 0.84<br>(0.80-0.88)   | 0.64<br>(0.61-0.67)   | 16.0<br>(12.1-19.7) | 35.9<br>(32.7-39.0)   |
| Emergency department and urgent care    | 290292                 | 855             | 59149.21               | 14.45<br>(13.52-15.46)                   | 580584                           | 2083            | 76214.31               | 27.33<br>(26.18-28.53)                   | 0.55<br>(0.51-0.60)   | 0.45<br>(0.41-0.49)   | 45.0<br>(40.4-49.2) | 55.0<br>(50.8-58.8)   |
| COVID-19 hospital death <sup>b</sup>    | 290292                 | 10              | 59252.1                | 0.17<br>(0.09-0.31)                      | 580584                           | 59              | 76449.67               | 0.77<br>(0.60-1.00)                      | 0.22<br>(0.11-0.44)   | 0.17<br>(0.08-0.36)   | 77.7<br>(56.4-88.6) | 82.7<br>(63.7-91.7)   |

CI, confidence interval; rVE, relative vaccine effectiveness

<sup>a</sup>Adjusted for covariates age group, sex, race/ethnicity, index date (in months), history of SARS-CoV-2 infection, number of outpatient and virtual visits, preventive care, number of monovalent vaccines prior to index date, time between latest monovalent vaccine and index date, and medical center area.

<sup>b</sup>Adjusted for antiviral therapy in addition to covariates above. Medical center area removed from adjustment set due to lack of model convergence.

**Supplementary Table 5.** Incidence rate, hazard ratio, and effectiveness of the bivalent (original and Omicron BA.4/BA.5) mRNA-1273 COVID-19 vaccine in preventing medically attended SARS-CoV-2 infection and COVID-19 hospital death (COVID-19 unvaccinated group as comparator).

| Outcomes                                | Bivalent vaccine group |                 |                        |                                          | COVID-19 unvaccinated group |                 |                        |                                          | Hazard Ratio (95% CI) |                       | VE (95% CI)            |                       |
|-----------------------------------------|------------------------|-----------------|------------------------|------------------------------------------|-----------------------------|-----------------|------------------------|------------------------------------------|-----------------------|-----------------------|------------------------|-----------------------|
|                                         | N                      | Number of cases | Number of person years | Incidence per 1000 person-years (95% CI) | N                           | Number of cases | Number of person years | Incidence per 1000 person-years (95% CI) | Unadjusted            | Adjusted <sup>a</sup> | Unadjusted             | Adjusted <sup>a</sup> |
| Medically attended SARS-CoV-2 infection |                        |                 |                        |                                          |                             |                 |                        |                                          |                       |                       |                        |                       |
| All care settings                       | 290292                 | 3221            | 58867.97               | 54.72<br>(52.86-56.64)                   | 204655                      | 1578            | 39779.99               | 39.67<br>(37.76-41.67)                   | 1.38<br>(1.30-1.46)   | 0.89<br>(0.83-0.96)   | -27.3<br>(-31.6--22.8) | 10.7<br>(4.4-16.6)    |
| Emergency department and urgent care    | 290292                 | 855             | 59149.21               | 14.45<br>(13.52-15.46)                   | 204655                      | 815             | 39872.1                | 20.44<br>(19.08-21.89)                   | 0.71<br>(0.64-0.78)   | 0.45<br>(0.40-0.50)   | 29.3<br>(22.1-35.7)    | 55.4<br>(50.3-60.1)   |
| COVID-19 hospital death <sup>b</sup>    | 290292                 | 10              | 59252.1                | 0.17<br>(0.09-0.31)                      | 204655                      | 35              | 39972.07               | 0.88<br>(0.63-1.22)                      | 0.19<br>(0.09-0.39)   | 0.10<br>(0.05-0.22)   | 80.9<br>(61.5-90.5)    | 89.7<br>(77.7-95.2)   |

CI, confidence interval; VE, vaccine effectiveness

<sup>a</sup>Adjusted for covariates age group, sex, race/ethnicity, index date (in months), body mass index, smoking, Charlson comorbidity score, frailty index, kidney disease, lung disease, diabetes, immunocompromised status, history of SARS-CoV-2 infection, history of SARS-CoV-2 molecular test, number of outpatient and virtual visits, preventive care, Medicaid, neighborhood median household income, and medical center area.

<sup>b</sup>Adjusted for antiviral therapy in addition to covariates above. Neighborhood median household income and medical center area removed from adjustment set due to lack of model convergence.

When the hazard ratio or its 95% CI was >1, the VE or its 95% CI was transformed as  $([1/\text{hazard ratio}] - 1) \times 100$ .

**Supplementary Table 6.** Strengthening the Reporting of Observational Studies in Epidemiology (STROBE) Statement  
STROBE Statement—checklist of items that should be included in reports of observational studies.

Pages and manuscript line numbers refer to the final submitted version.

| Section              | Item No. | Recommendation                                                                                                                                                                     | Implementation                      |
|----------------------|----------|------------------------------------------------------------------------------------------------------------------------------------------------------------------------------------|-------------------------------------|
| Title and abstract   | 1        | (a) Indicate the study’s design with a commonly used term in the title or the abstract                                                                                             | Abstract                            |
|                      |          | (b) Provide in the abstract an informative and balanced summary of what was done and what was found                                                                                | Abstract                            |
| Introduction         |          |                                                                                                                                                                                    |                                     |
| Background/rationale | 2        | Explain the scientific background and rationale for the investigation being reported                                                                                               | Introduction                        |
| Objectives           | 3        | State specific objectives, including any prespecified hypotheses                                                                                                                   | Introduction                        |
| Methods              |          |                                                                                                                                                                                    |                                     |
| Study design         | 4        | Present key elements of study design early in the paper                                                                                                                            | Abstract, Introduction, and Methods |
| Setting              | 5        | Describe the setting, locations, and relevant dates, including periods of recruitment, exposure, follow-up, and data collection                                                    | Methods                             |
| Participants         | 6        | (a) Cohort study—Give the eligibility criteria, and the sources and methods of selection of participants. Describe methods of follow-up                                            | Methods                             |
|                      |          | Case-control study—Give the eligibility criteria, and the sources and methods of case ascertainment and control selection. Give the rationale for the choice of cases and controls |                                     |
|                      |          | Cross-sectional study—Give the eligibility criteria, and the sources and methods of selection of participants                                                                      |                                     |
|                      |          | (b) Cohort study—For matched studies, give matching criteria and number of exposed and unexposed                                                                                   | Methods                             |
|                      |          | Case-control study—For matched studies, give matching criteria and the number of controls per case                                                                                 |                                     |

| Section                      | Item No. | Recommendation                                                                                                                                                                                    | Implementation       |
|------------------------------|----------|---------------------------------------------------------------------------------------------------------------------------------------------------------------------------------------------------|----------------------|
| Variables                    | 7        | Clearly define all outcomes, exposures, predictors, potential confounders, and effect modifiers. Give diagnostic criteria, if applicable                                                          | Methods              |
| Data sources/<br>measurement | 8*       | For each variable of interest, give sources of data and details of methods of assessment (measurement). Describe comparability of assessment methods if there is more than one group              | Methods              |
| Bias                         | 9        | Describe any efforts to address potential sources of bias                                                                                                                                         | Methods              |
| Study size                   | 10       | Explain how the study size was arrived at                                                                                                                                                         | Methods and Figure 1 |
| Quantitative variables       | 11       | Explain how quantitative variables were handled in the analyses. If applicable, describe which groupings were chosen and why                                                                      | Methods              |
| Statistical methods          | 12       | (a) Describe all statistical methods, including those used to control for confounding                                                                                                             | Methods              |
|                              |          | (b) Describe any methods used to examine subgroups and interactions                                                                                                                               | Methods              |
|                              |          | (c) Explain how missing data were addressed                                                                                                                                                       | Methods              |
|                              |          | (d) <i>Cohort study</i> —If applicable, explain how loss to follow-up was addressed                                                                                                               | Methods              |
|                              |          | <i>Case-control study</i> —If applicable, explain how matching of cases and controls was addressed                                                                                                |                      |
|                              |          | <i>Cross-sectional study</i> —If applicable, describe analytical methods taking account of sampling strategy                                                                                      |                      |
|                              |          | (e) Describe any sensitivity analyses                                                                                                                                                             | n/a                  |
| <b>Results</b>               |          |                                                                                                                                                                                                   |                      |
| Participants                 | 13*      | (a) Report numbers of individuals at each stage of study—eg numbers potentially eligible, examined for eligibility, confirmed eligible, included in the study, completing follow-up, and analysed | Results and Figure 1 |
|                              |          | (b) Give reasons for non-participation at each stage                                                                                                                                              | Result and Figure 1  |
|                              |          | (c) Consider use of a flow diagram                                                                                                                                                                | Results and Figure 1 |

| Section           | Item No. | Recommendation                                                                                                                                                                                               | Implementation                               |
|-------------------|----------|--------------------------------------------------------------------------------------------------------------------------------------------------------------------------------------------------------------|----------------------------------------------|
| Descriptive data  | 14*      | (a) Give characteristics of study participants (eg demographic, clinical, social) and information on exposures and potential confounders                                                                     | Results, Figure 1, Table 1, and Table S1     |
|                   |          | (b) Indicate number of participants with missing data for each variable of interest                                                                                                                          | Results, Table 1, and Table S1               |
|                   |          | (c) <i>Cohort study</i> —Summarise follow-up time (eg, average and total amount)                                                                                                                             | Results, Table S2, Table S3, and Figure 3    |
| Outcome data      | 15*      | <i>Cohort study</i> —Report numbers of outcome events or summary measures over time                                                                                                                          | Results, Figure 2, Figure 4, and Table S2-S5 |
|                   |          | <i>Case-control study</i> —Report numbers in each exposure category, or summary measures of exposure                                                                                                         | n/a                                          |
|                   |          | <i>Cross-sectional study</i> —Report numbers of outcome events or summary measures                                                                                                                           | n/a                                          |
| Main results      | 16       | (a) Give unadjusted estimates and, if applicable, confounder-adjusted estimates and their precision (eg, 95% confidence interval). Make clear which confounders were adjusted for and why they were included | Results, Figure 2, Figure 4, and Table S2-S5 |
|                   |          | (b) Report category boundaries when continuous variables were categorized                                                                                                                                    | Results, Table 1, and Table S1               |
|                   |          | (c) If relevant, consider translating estimates of relative risk into absolute risk for a meaningful time period                                                                                             | n/a                                          |
| Other analyses    | 17       | Report other analyses done—eg analyses of subgroups and interactions, and sensitivity analyses                                                                                                               | Results, Figure 3, and Table S2-S3           |
| <b>Discussion</b> |          |                                                                                                                                                                                                              |                                              |
| Key results       | 18       | Summarise key results with reference to study objectives                                                                                                                                                     | Discussion                                   |
| Limitations       | 19       | Discuss limitations of the study, taking into account sources of potential bias or imprecision. Discuss both direction and magnitude of any potential bias                                                   | Discussion                                   |
| Interpretation    | 20       | Give a cautious overall interpretation of results considering objectives, limitations, multiplicity of analyses, results from similar studies, and other relevant evidence                                   | Discussion                                   |

| Section                  | Item No. | Recommendation                                                                                                                                                | Implementation    |
|--------------------------|----------|---------------------------------------------------------------------------------------------------------------------------------------------------------------|-------------------|
| Generalisability         | 21       | Discuss the generalisability (external validity) of the study results                                                                                         | Discussion        |
| <b>Other information</b> |          |                                                                                                                                                               |                   |
| Funding                  | 22       | Give the source of funding and the role of the funders for the present study and, if applicable, for the original study on which the present article is based | Funding statement |

\*Give information separately for cases and controls in case-control studies and, if applicable, for exposed and unexposed groups in cohort and cross-sectional studies.

**Note:** An Explanation and Elaboration article discusses each checklist item and gives methodological background and published examples of transparent reporting. The STROBE checklist is best used in conjunction with this article (freely available on the Web sites of PLoS Medicine at <http://www.plosmedicine.org/>, Annals of Internal Medicine at <http://www.annals.org/>, and Epidemiology at <http://www.epidem.com/>). Information on the STROBE Initiative is available at [www.strobe-statement.org](http://www.strobe-statement.org).
